# Supplementary material for: A Novel CARMIL2 Immunodeficiency Identified in a Subset of Cavalier King Charles Spaniels with Pneumocystis and Bordetella Pneumonia
Source: MDPI journal article supplement (doi:10.3390/jof10030198), 2024-03-05
Supplement: s1 [file s1]

**Table S1.** Clinical data for 15 dogs previously diagnosed with PCP and clear of the *CARMIL2* variant

| Breed                  | Age (years)   | Sex           | Country of Origin | Reference |
|------------------------|---------------|---------------|-------------------|-----------|
| Whippet                | 3             | MN            | Austria           | [27]      |
| American Staffordshire | 5             | MN            | Italy             | [6]       |
| Akita Inu              | 2             | MI            | Italy             | [6]       |
| Toy Poodle             | < 1           | MI            | Italy             | [6]       |
| Border Collie          | < 1           | FI            | Italy             | [6]       |
| Golden Retriever       | 11            | MI            | Italy             | [6]       |
| Not available          | Not available | Not available | Italy             | [6]       |
| Boxer                  | < 1           | FI            | Italy             | [6]       |
| Not available          | Not available | Not available | Italy             | [6]       |
| Not available          | Not available | Not available | Italy             | [6]       |
| Not available          | Not available | Not available | Italy             | [6]       |
| English Bulldog        | 11            | MI            | Italy             | [6]       |
| Jack Russel Terrier    | 10            | FI            | Italy             | [6]       |
| Mixed breed            | 11            | FI            | Italy             | [6]       |
| Not available          | Not available | Not available | Italy             | [6]       |

FI = Female intact; MI = Male intact; MN = Male neutered
